# Supplementary material
Source: MDPI journal article supplement (https://www.mdpi.com/2073-4344/12/1/87)
Supplement: s1 [file s1]

# SUPPLEMENTARY DATA

## **Bulk Co<sub>3</sub>O<sub>4</sub> for Methane Oxidation: Effect of the Synthesis Route on Physico-Chemical Properties and Catalytic Performance**

**Andoni Choya \*, Beatriz de Rivas, Jose Ignacio Gutiérrez-Ortiz and Rubén López-Fonseca**

<sup>1</sup> Chemical Technologies for Environmental Sustainability Group, Department of Chemical Engineering, Faculty of Science and Technology, University of the Basque Country UPV/EHU, Barrio Sarriena s/n, Leioa, Bizkaia, E-48940, Spain; beatriz.derivas@ehu.eus (B.d.R.); joseignacio.gutierrez@ehu.eus (J.I.G.-O.); ruben.lopez@ehu.eus (R.L.-F)

\* Correspondence: andoni.choya@ehu.eus; Tel.: +34-94-601-3485

Table S1. Criteria for accurate analysis of intrinsic reaction rates of the foam catalysts (as estimated for the CC catalyst at 375 °C).

Figure S1. N<sub>2</sub> physisorption isotherms of the bulk Co<sub>3</sub>O<sub>4</sub> catalysts.

Figure S2. XRD patterns of the bulk Co<sub>3</sub>O<sub>4</sub> catalysts.

Figure S3. Raman spectra of the bulk Co<sub>3</sub>O<sub>4</sub> catalysts.

Figure S4. CH<sub>4</sub>-TPRe profiles of the bulk Co<sub>3</sub>O<sub>4</sub> catalysts.

Figure S5. Close-up view of the CH<sub>4</sub>-TPRe profiles in the 300-500 °C range of the CC catalyst before and after the stability test.

**Table S1:** Criteria for accurate analysis of intrinsic reaction rates of the foam catalysts (as estimated for the CC catalyst at 375 °C)

| Criteria                           | Recommendation                                | At 375 °C           | Least favourable conditions |
|------------------------------------|-----------------------------------------------|---------------------|-----------------------------|
| Minimum bed length                 | Bodenstein parameter < $L_{bed}/d_{particle}$ | 4.5 < 79.5          | 55.6 < 79.5 <sup>b</sup>    |
| Minimum reactor diameter           | $d_{tube}/d_{particle} > 10$                  | 31.2 <sup>a</sup>   | 31.2 <sup>a</sup>           |
| Extraparticle mass transfer        | Carberry number < 0.05/n                      | 0.0042              | 0.046 <sup>b</sup>          |
| Extraparticle heat transfer        | $\gamma\beta_e Ca < 0.05$                     | 0.0017              | 0.028 <sup>c</sup>          |
| Intraparticle mass transport       | Wheeler-Weisz modulus < 0.15                  | $4.3 \cdot 10^{-4}$ | $8.0 \cdot 10^{-4d}$        |
| Intraparticle heat transport       | Mears parameter < 0.1                         | $2.0 \cdot 10^{-6}$ | $4.2 \cdot 10^{-6d}$        |
| Radial temperature gradient        | Radial gradient < 0.05                        | 0.004               | 0.0057 <sup>d</sup>         |
| Intraparticle temperature gradient | Temperature gradient < 0.3                    | 0.15                | 0.175 <sup>c</sup>          |
| Bed dilution                       | Bed dilution parameter < 0.05                 | 0.047               | 0.047                       |

<sup>a</sup>The value of this ratio is 25.4 if the thermocouple is taken into consideration for calculation of reactor diameter.

<sup>b</sup>Determined at 500 °C.

<sup>c</sup>Determined at 600 °C.

<sup>d</sup>Determined at 450 °C.

For the definition of each parameter the readers should refer to Eurokin - <http://eurokin.org/>; J. Perez-Ramirez, R.J. Berger, G. Mul, F. Kapteijn, J.A. Moulijn, *Catalysis Today* 60 (2000) 93–109 or A. Aranzabal, J.A. González-Marcos, J.L. Ayastuy, J.R. González-Velasco, *Chem. Eng. Sci.* 61 (2006) 3564–3576.

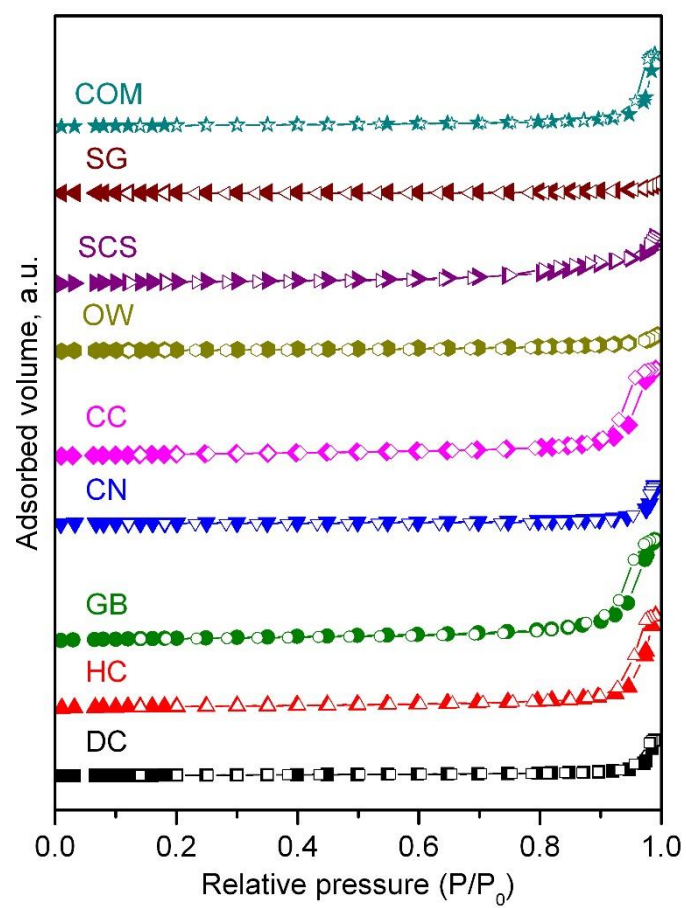

**Figure S1:** N<sub>2</sub> physisorption isotherms of the bulk Co<sub>3</sub>O<sub>4</sub> catalysts.

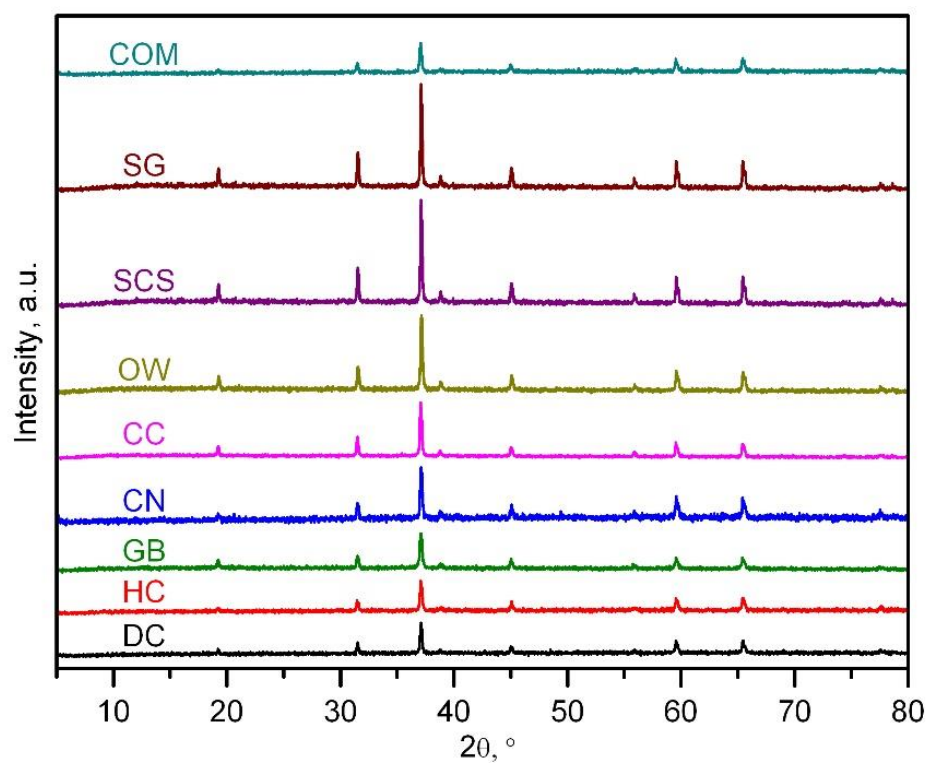

**Figure S2:** XRD patterns of the bulk  $\text{Co}_3\text{O}_4$  catalysts.

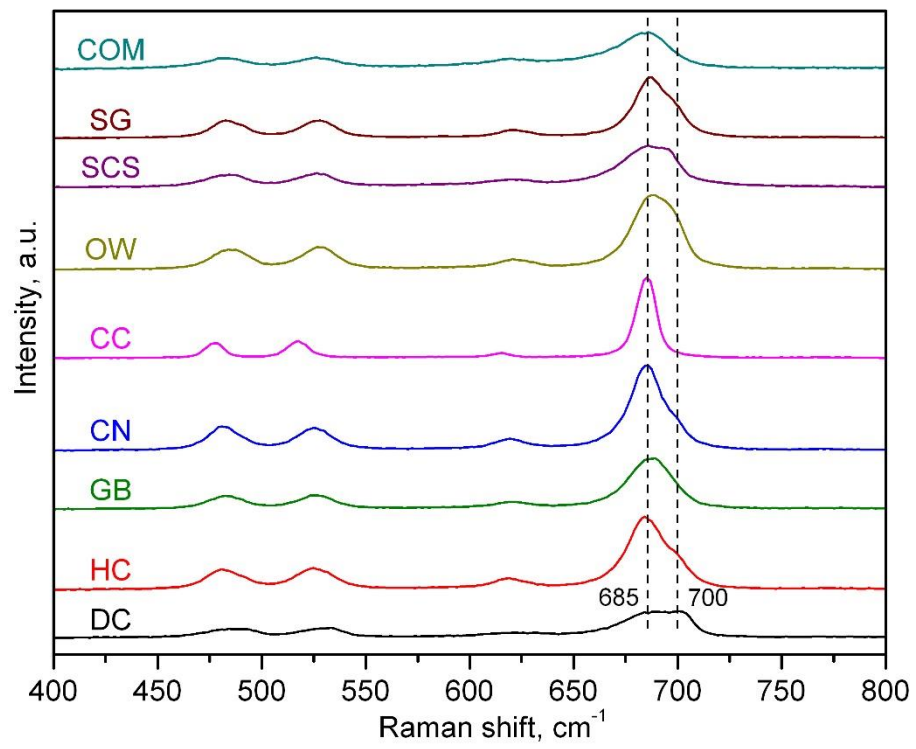

**Figure S3:** Raman spectra of the bulk  $\text{Co}_3\text{O}_4$  catalysts.

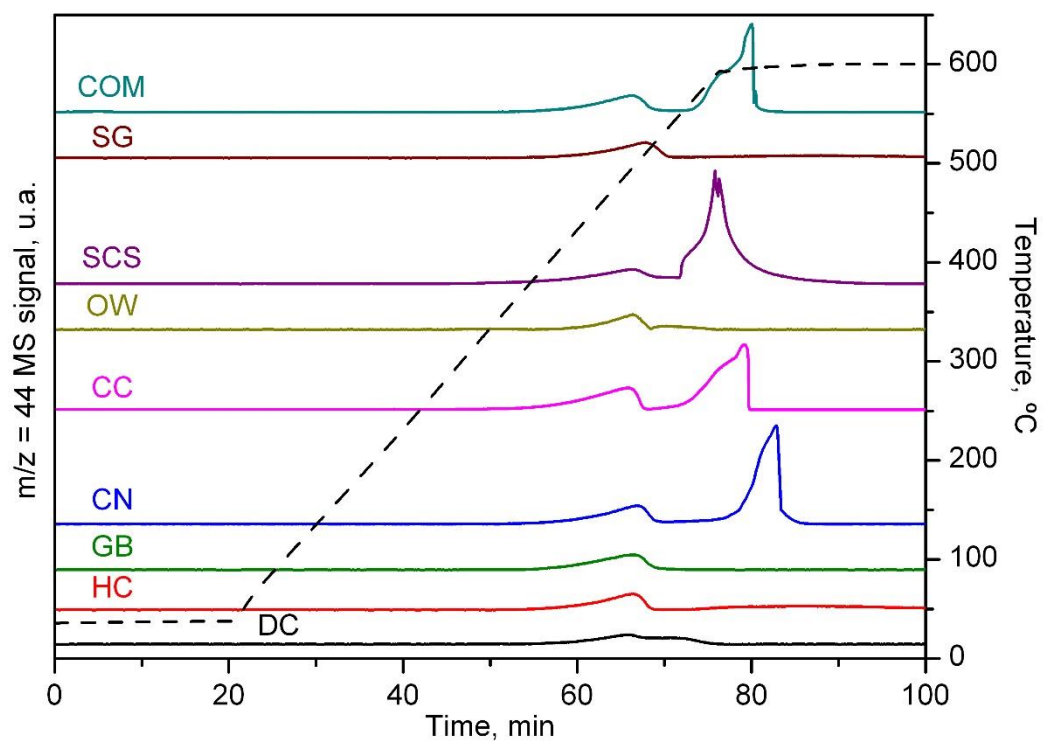

**Figure S4:** CH<sub>4</sub>-TPRe profiles of the bulk Co<sub>3</sub>O<sub>4</sub> catalysts.

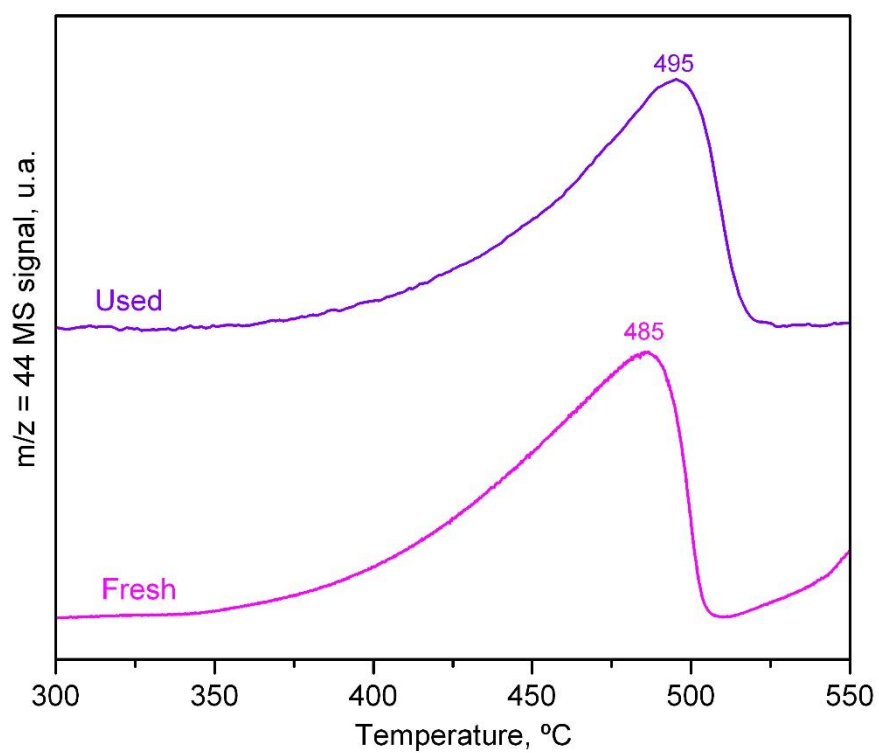

**Figure S5:** Close-up view of the CH<sub>4</sub>-TPRe profiles in the 300-500 °C range of the CC catalyst before and after the stability test.
